# Supplementary material for: A Loss Reduction Optimization Method for Distribution Network Based on Combined Power Loss Reduction Strategy
Source: Hindawi journal article supplement (doi:10.1155/2021/9475754), 2021-01-01
Supplement: f1 [file 9475754.f1.docx]

**Supplementary Material Titled “A Loss Reduction Optimization Method for Distribution Network Based on Combined Power Loss Reduction Strategy”**

Jihua Xie, Chang Chen, Huan Long

School of Electric Engineering

Southeast University

Table S1: Line Types

| Line Type | Type Number | Unit Resistance  （Ω/km） | Unit Reactance（Ω/km） |
| --- | --- | --- | --- |
| YJV22-3*240 | 1 | 0.17 | 0.09 |
| JKLYJ-150 | 2 | 0.34 | 0.21 |
| YXSB-150 | 3 | 0.21 | 0.34 |
| LGJ-50 | 4 | 0.65 | 0.39 |
| LGJ-70 | 5 | 0.45 | 0.34 |
| JKLYJ-70 | 6 | 0.36 | 0.44 |
| JKLYJ-150/10 | 7 | 0.34 | 0.21 |
| YJV22-3*35 | 8 | 0.11 | 1.17 |
| YJV22-3*50 | 9 | 0.11 | 0.82 |
| YJV22-3*70 | 10 | 0.1 | 0.58 |
| YJV22-3*120 | 11 | 0.1 | 0.34 |
| YJV22-3*150 | 12 | 0.09 | 0.27 |
| YJV22-3*300 | 13 | 0.09 | 0.11 |
| YJV22-3*400 | 14 | 0.05 | 0.22 |
| YJV22-3*185 | 15 | 0.09 | 0.22 |
| JKLYJ-95 | 16 | 0.35 | 0.32 |
| JkLYJ-120 | 17 | 0.34 | 0.25 |

Table S2: Transformer Types

| Distribution Type | Type Number | Short-circuit Loss  (kW) | Open Circuit Loss  (kW) | Percentage of Short Circuit Voltage  (%) |
| --- | --- | --- | --- | --- |
| S11-M-315/10 | 1 | 3.65 | 0.48 | 4 |
| SBH15M-315 | 2 | 3.55 | 0.17 | 4 |
| SBH16-M-400/10 | 3 | 4.3 | 0.16 | 4 |
| SCB10-630/10 | 4 | 5.9 | 1.36 | 4 |
| SH16-M-630/10 | 5 | 6.2 | 0.23 | 4.5 |
| SBH15-M-400/10 | 6 | 4.07 | 0.18 | 4 |
| S7-630 | 7 | 8.17 | 1.29 | 4.5 |
| S11-30 | 8 | 0.6 | 0.09 | 4 |
| S11-50 | 9 | 0.87 | 0.135 | 4 |
| S11-160 | 10 | 2.2 | 0.27 | 4 |
| S11-315 | 11 | 3.65 | 0.48 | 4 |
| S11-630 | 12 | 6.2 | 0.805 | 4.5 |

Table S3: Branch Information of the 10kV feeder in the actual distribution network

| Branch  Number | Head  Node | Tail  Node | Type  Number | Branch  Number | Head  Node | Tail  Node | Type  Number |
| --- | --- | --- | --- | --- | --- | --- | --- |
| 1 | 1 | 2 | 1 | 29 | 34 | 35 | 5 |
| 2 | 2 | 3 | 2 | 30 | 35 | 37 | 5 |
| 3 | 3 | 4 | 2 | 31 | 34 | 39 | 7 |
| 4 | 4 | 5 | 2 | 32 | 39 | 40 | 2 |
| 5 | 5 | 6 | 3 | 33 | 40 | 41 | 2 |
| 6 | 6 | 7 | 3 | 34 | 41 | 42 | 5 |
| 7 | 7 | 8 | 2 | 35 | 42 | 43 | 6 |
| 8 | 8 | 9 | 2 | 36 | 43 | 44 | 2 |
| 9 | 9 | 10 | 1 | 37 | 41 | 46 | 2 |
| 10 | 10 | 11 | 2 | 38 | 46 | 47 | 2 |
| 11 | 11 | 12 | 1 | 39 | 47 | 48 | 2 |
| 12 | 12 | 13 | 4 | 40 | 48 | 49 | 2 |
| 13 | 12 | 15 | 2 | 41 | 49 | 50 | 1 |
| 14 | 15 | 16 | 1 | 42 | 50 | 51 | 1 |
| 15 | 15 | 18 | 2 | 43 | 50 | 54 | 1 |
| 16 | 18 | 20 | 5 | 44 | 54 | 55 | 1 |
| 17 | 20 | 21 | 2 | 45 | 23 | 24 | 2 |
| 18 | 21 | 22 | 5 | 46 | 35 | 36 | 3 |
| 19 | 22 | 23 | 5 | 47 | 13 | 14 | 1 |
| 20 | 21 | 25 | 2 | 48 | 51 | 52 | 4 |
| 21 | 25 | 26 | 2 | 49 | 44 | 45 | 3 |
| 22 | 26 | 27 | 5 | 50 | 27 | 28 | 1 |
| 23 | 25 | 29 | 1 | 51 | 51 | 53 | 4 |
| 24 | 29 | 30 | 2 | 52 | 18 | 19 | 1 |
| 25 | 30 | 31 | 6 | 53 | 37 | 38 | 6 |
| 26 | 31 | 32 | 6 | 54 | 55 | 56 | 5 |
| 27 | 32 | 33 | 2 | 55 | 16 | 17 | 1 |
| 28 | 33 | 34 | 2 |  |  |  |  |
